# Supplementary material for: Light-controlled morphological development of self-organizing bioinspired nanocomposites
Source: Royal Society of Chemistry journal article supplement (doi:10.1039/d3nr05828j), 2024-01-01
Supplement: d3nr05828j1.pdf [file d3nr05828j1.pdf]

## Electronic Supplementary Information (ESI)

### Light-controlled morphological development of self-organizing bioinspired nanocomposites

Marloes H. Bistervels<sup>a</sup>, Niels T. Hoogendoorn<sup>a</sup>, Marko Kamp<sup>a</sup>, Hinco Schoenmaker<sup>a</sup>, Albert M. Brouwer<sup>b</sup>, Willem L. Noorduin<sup>a,b</sup>

<sup>a</sup> AMOLF, Science Park 104, 1098 XG Amsterdam, The Netherlands. <sup>b</sup> Van 't Hoff Institute for Molecular Sciences, University of Amsterdam, Amsterdam 1090 GD, The Netherlands.

E-mail: noorduin@amolf.nl

#### Content:

1. Supplementary Figure S1
2. Supplementary Figure S2
3. Supplementary Figure S3
4. Supplementary Figure S4
5. Supplementary Figure S5
6. Supplementary Movie 1
7. Supplementary Movie 2

### Supplementary Figure S1

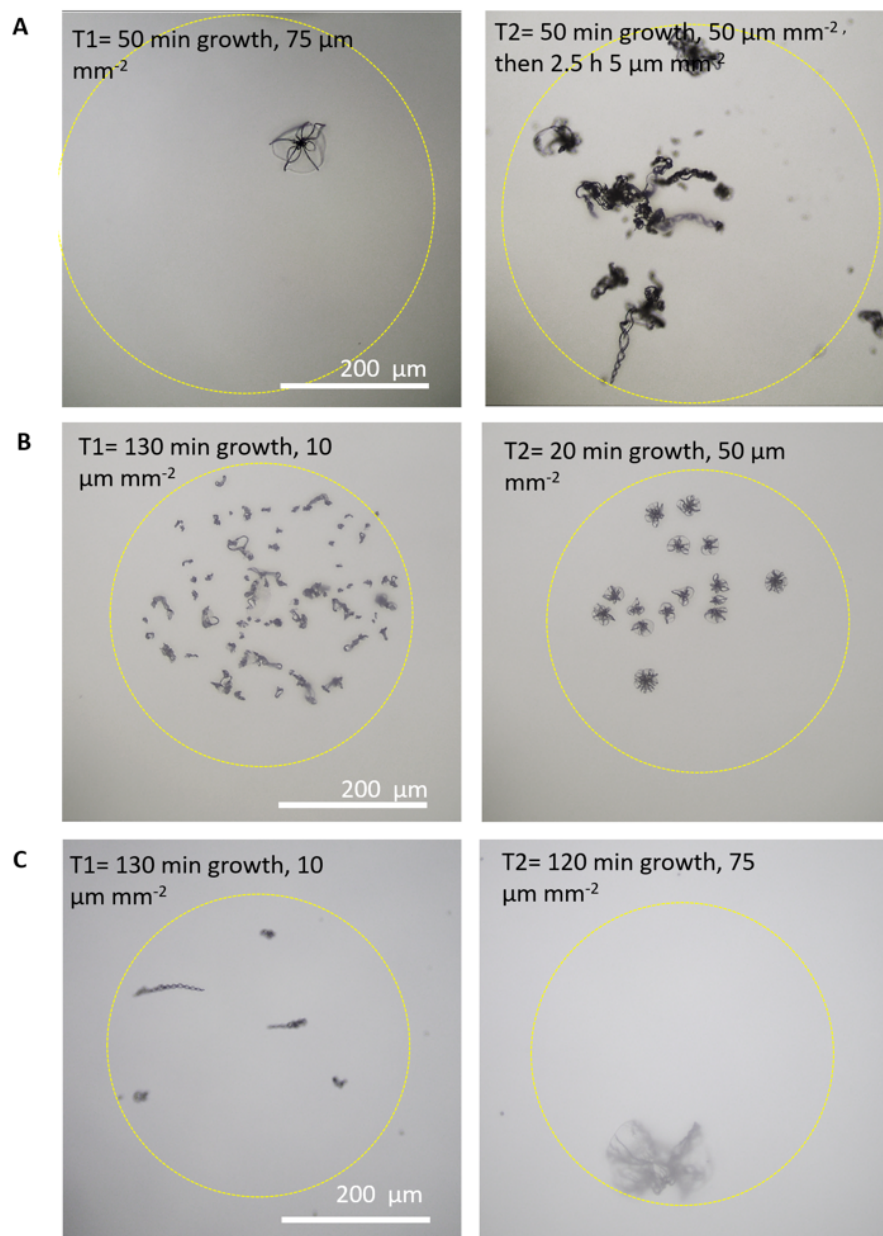

Fig. S1. Light microscope images showing switching between growth regimes due to modulations in light intensity at 275 nm UV in a solution of BaCO<sub>3</sub>/SiO<sub>2</sub> precursor solutions (20 mM BaCl<sub>2</sub>, 9 mM Na<sub>2</sub>SiO<sub>3</sub>) with A) 2 mM KP, 20 mM DTAB, pH 10.89, 250 μm radius (coral→helix) ; B) 5 mM KP, 50 mM DTAB, pH 10.89, 200 μm radius (helix→ coral); and C) 2 mM KP, 20 mM DTAB, pH 10.85, 200 μm radius (helix→coral). The yellow circle indicates the illuminated area.

### Supplementary Figure S2

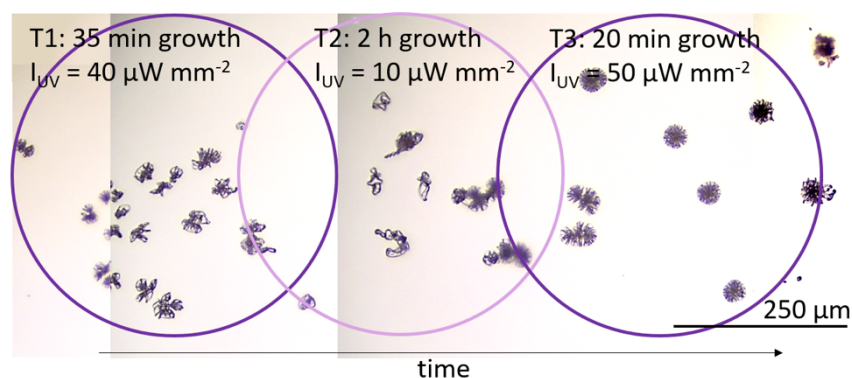

Fig S2. Light-induced nucleation and growth of BaCO<sub>3</sub>/SiO<sub>2</sub> structures using low and high light intensity irradiation to induce consecutive switching between coral and helical growth modes. The precursor solution contains 20 mM BaCl<sub>2</sub>, 11 mM Na<sub>2</sub>SiO<sub>3</sub>, 5 mM KP, and 50 mM DTAB at pH 11.3. The circles represent the illuminated areas (250 μm radius) for high (dark purple) and low (light purple) light intensity, moving from T1 to T3.

### Supplementary Figure S3

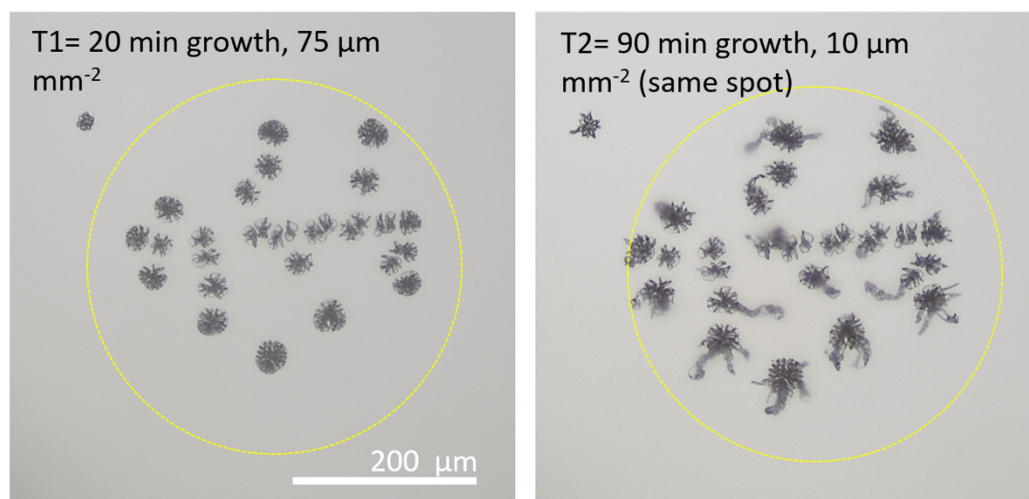

Fig. S3. Switching growth modes with single structures using first (T1) high light intensity irradiation of 275 nm on a precursor solution of 20 mM BaCl<sub>2</sub>, 9 mM Na<sub>2</sub>SiO<sub>3</sub>, 5 mM KP, 50 mM DTAB, pH 10.9, 200 μm radius, followed by (T2) low light intensity irradiation. Consistent transitioning from coral to helical growth is observed upon reduction of the light intensity.

### Supplementary Figure S4

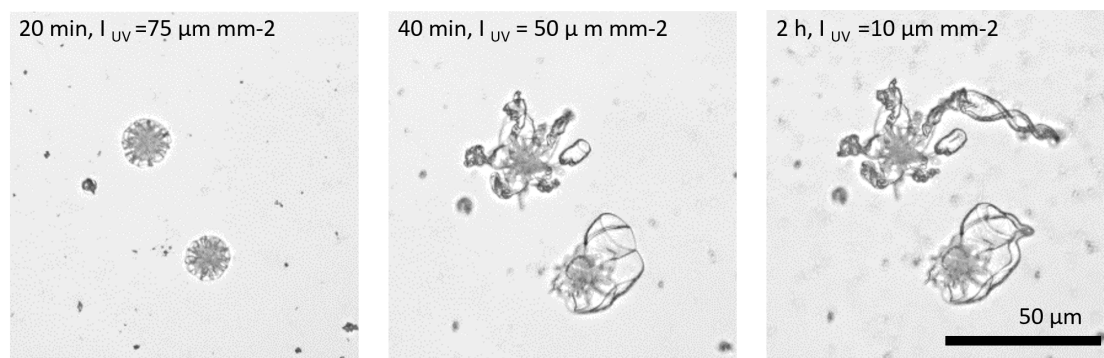

Fig. S4. Switching growth modes with single structures using first high light intensity irradiation of 275 nm on a precursor solution of 20 mM  $\text{BaCl}_2$ , 11.5 mM  $\text{Na}_2\text{SiO}_3$ , 5 mM KP, 50 mM DTAB, pH 10.9, 150  $\mu\text{m}$  radius, followed by low light intensity irradiation.

### Supplementary Figure S5

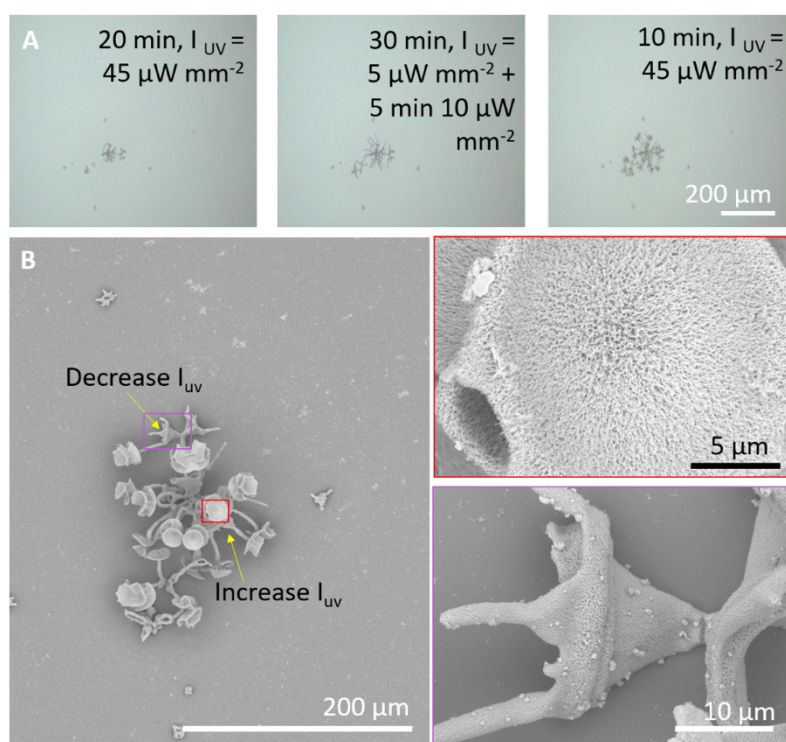

Fig. S5. Sculpting of  $\text{BaCO}_3/\text{SiO}_2$  structures by decreasing and increasing the light intensity, causing narrowing and opening of the growth direction respectively. A) Timelapse; and B) resulting SEM images of 275 nm UV irradiation on a precursor solution of 20 mM  $\text{BaCl}_2$ , 9 mM  $\text{Na}_2\text{SiO}_3$ , 5 mM KP, 50 mM DTAB, pH 11.5, 100  $\mu\text{m}$  radius.

## Supplementary Movies

- Supplementary Movie 1:** Light-controlled switching from coral to helical growth mode.  
In this movie, the light-controlled transition from coral growth to helical growth of a single  $\text{BaCO}_3/\text{SiO}_2$  nanocomposite is presented. The movie is a zoom in from a larger illuminated area. The first 2 seconds show the growth of an architecture with light intensity ( $I_{UV}$ ) =  $75 \mu\text{m mm}^{-2}$ , yielding growth of a coral shape. Then  $I_{UV}$  is reduced to  $10 \mu\text{m mm}^{-2}$ , inducing helical growth. The purple line is an indicative representation of the light intensity. The movie consists of 78 frames that cover a timespan of 140 minutes real-time growth.
- Supplementary Movie 2:** Light-controlled switching from helical to coral growth mode.  
In this movie, the light-controlled the transition from helical growth to coral growth of a single  $\text{BaCO}_3/\text{SiO}_2$  nanocomposite is presented. The movie is a zoom in from a larger illuminated area. The first 4 seconds show the growth of an architecture with  $I_{UV} = 10 \mu\text{m mm}^{-2}$ , yielding helical growth. Then  $I_{UV}$  is briefly increased to  $100 \mu\text{m mm}^{-2}$ , and subsequently set to  $50 \mu\text{m mm}^{-2}$  inducing the growth of a coral shape. The purple line is an indicative representation of the light intensity. The movie consists of 35 frames that cover a timespan of 120 minutes real-time growth.
